# Supplementary material
Source: MDPI journal article supplement (https://www.mdpi.com/search?q=sustainability-12-00545)
Supplement: s001 [file sustainability-12-00545-s001.pdf]

## Supplementary Material 1

### 1. Analytic hierarchy process method

#### 1.1. Comparative judgment matrix

According to AHP method, the comparative judgment matrix of green innovation risk identification criteria of manufacturing industry under the GVC is constructed as follow:

$$A = \begin{bmatrix} a_{11} & a_{12} & a_{13} & L & a_{1n} \\ a_{21} & a_{22} & a_{23} & L & a_{2n} \\ a_{31} & a_{32} & a_{33} & L & a_{3n} \\ M & M & M & M & M \\ a_{n1} & a_{n2} & a_{n3} & L & a_{nn} \end{bmatrix} = \{a_{ij}\}$$

where  $a_{ij}$  ( $a_{ij} > 0$ ) is the relative importance of row  $i$  and column  $j$  in the identification criteria system of green innovation risk assessment of manufacturing industry in China under the GVC, and obviously  $a_{ii} = 1$  and  $a_{ij} = a_{ji}^{-1}$  ( $i = 1, 2, \dots, n; j = 1, 2, \dots, n$ ). As for the value in the comparison judgment matrix, Saaty1-9 contrast scale is used to measure the significance of the comparison among indicators. Contrast rulers is shown in Table 1.

**Table S1.** Saaty's contrast ruler.

| Contrast scale | Denotation and connotation                                                                                                                                                                                 |
|----------------|------------------------------------------------------------------------------------------------------------------------------------------------------------------------------------------------------------|
| 1              | Identification criterion $C_i$ is of equal importance to identification criterion $C_j$ .                                                                                                                  |
| 3              | Identification criterion $C_i$ is slightly more important than identification criterion $C_j$ .                                                                                                            |
| 5              | Identification criterion $C_i$ is obviously more important than identification criterion $C_j$ .                                                                                                           |
| 7              | Identification criterion $C_i$ is more important than identification criterion $C_j$ .                                                                                                                     |
| 9              | Identification criterion $C_i$ is absolutely more important than identification criterion $C_j$ .                                                                                                          |
| 2, 4, 6, 8     | The result of the comparison of the importance of identification criterion $C_i$ and identification criterion $C_j$ is in the middle position above.                                                       |
| Reciprocal     | The result of the importance comparison between identification criterion $C_i$ and identification criterion $C_j$ is the reciprocal of identification criterion $C_j$ and identification criterion $C_i$ . |

#### 1.2. Weight set and consistency test

The weight set is calculated through the weight judgment matrix of green innovation risk assessment, and the consistency test is conducted. The specific steps are as follows.

(i) Each row element of the comparison judgment matrix is multiplied separately, and the calculation formula is as follow:

$$M_i = \prod_{j=1}^n a_{ij}, \quad i = 1, 2, \dots, n$$

where  $a_{ij}$  is the element in row  $i$  and column  $j$  in the weight comparison judgment matrix of green innovation risk identification criteria.

(ii) Taking the  $n$ -TH root of  $M_i$ , and the calculation formula is as follow:

$$\overline{W}_i = \sqrt[n]{M_i}, \quad i = 1, 2, \dots, n$$

(iii) Performing consistency processing on  $\overline{W}_i$ , and the calculation formula is as follow:

$$w_i = \frac{\overline{W}_i}{\sum_{i=1}^n \overline{W}_i}, \quad i = 1, 2, \dots, n$$

where  $w_i$  is the weight of criterion  $i$  in the green innovation risk assessment system of manufacturing industry in China under the GVC to the criterion at the next higher level. It is concluded that  $W = (w_1, w_2, \dots, w_n)$  is the relative importance of the next layer to the previous layer.

(iv) Consistency test.

$$\lambda_{\max} = \sum_{i=1}^n \frac{(AW)_i}{nW_i}$$

where  $\lambda_{\max}$  is the largest characteristic root of green innovation risk judgment matrix.

$$CI = \frac{(\lambda_{\max} - n)}{(n - 1)}$$

where  $CI$  is the consistency criterion. Under  $n$  certain condition, the greater  $CI$  is, the worse the consistency will be; otherwise, the better the consistency will be. Since  $CI$  is the error caused by randomness, it should be compared with random consistency criterion  $RI$ .

$$CR = \frac{CI}{RI}$$

where  $CR$  is the random consistency ratio.  $RI$  values are shown in Table 2.

**Table S2.**  $RI$  values.

| $n$  | 1 | 2 | 3    | 4    | 5    | 6    | 7    | 8    | 9    | 10   |
|------|---|---|------|------|------|------|------|------|------|------|
| $RI$ | 0 | 0 | 0.58 | 0.96 | 1.12 | 1.24 | 1.32 | 1.41 | 1.45 | 1.49 |

The basis of consistency test is as follows. When  $CR < 0.1$ , the judgment matrix of green innovation risk assessment is consistent. Otherwise, the judgment matrix should be re-adjusted.

(v) Combined weights. The combination weight is the importance of the element layer to the target layer, and can be obtained through the weight of the element layer to the criterion layer and the weight of the criterion layer to the target layer. The consistency test steps of combined weights are as follows:

$$CI = \sum_{j=1}^m W_j CI_j$$

where  $W_j$  is the weight set of the  $j$ -th criterion layer in the green innovation risk assessment system of manufacturing industry in China under the GVC.  $CI_j$  is the  $CI$  of the comparison judgment matrix corresponding to the index of the  $j$ -th criterion layer.

$$RI = \sum_{j=1}^m W_j RI_j$$

where  $RI_j$  is the random consistency criterion corresponding to the  $j$ -th criterion layer in the green innovation risk identification system of manufacturing industry in China under GVC. If  $CR < 0.1$  is obtained from this equation, it means that the overall identification of green innovation risk is consistent. Otherwise, the judgment matrix should be re-adjusted to meet the requirement of  $CR < 0.1$ .

## 2. Fuzzy base definition

Definition 1. [1] If  $a = (a^L, a^M, a^U)$ , where  $0 < a^L \leq a^M \leq a^U$ ,  $a$  is called triangular fuzzy numbers (TFNs).  $a^L$  and  $a^U$  are the lower and upper bounds, whose function can be expressed as:

$$\mu_a(x) = \begin{cases} \frac{x - a^L}{a^M - a^L}, & a^L \leq x \leq a^M \\ \frac{x - a^U}{a^M - a^U}, & a^M \leq x \leq a^U \\ 0, & \text{else} \end{cases}$$

Meanwhile, TFNs  $a$  can be represented as Figure 1.

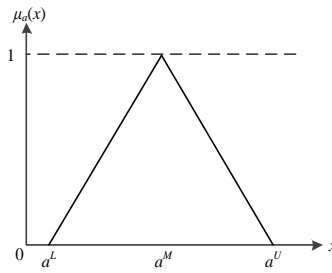

Figure S1. TFNs.

Definition 2. [1] Assuming that there are two TFN  $a = (a^L, a^M, a^U)$  and  $b = (b^L, b^M, b^U)$ , the basic algorithm for defining TFNs is as follows:

- (i)  $a \oplus b = (a^L + b^L, a^M + b^M, a^U + b^U)$
- (ii)  $a \otimes b = (a^L b^L, a^M b^M, a^U b^U)$

$$(iii) \forall \lambda \in R, \lambda a = (\lambda a^L, \lambda a^M, \lambda a^U)$$

Definition 3. [2] Each TFN corresponds to a certain value. In this paper, mean area method is adopted for fuzzy resolution. The fuzzy resolution value of TFN is as follows:

$$D(a) = \frac{1}{6}(a^L + a^M + a^U) \quad (11)$$

### 3. Deviation maximization method

The idea of deviation maximization is an idea that maximizes the distance between objects as far as possible. Some scholars applied it as an evaluation method in many scientific fields to achieve good evaluation effect. Let  $v_{ij} (i=1,2,\dots, n; j=1,2,\dots, m)$  represents the normalized value of the  $j$  criterion of the sub-industry of the  $i$  manufacturing industry. Let  $w_j$  be the weight of criterion  $j$ , and  $w_j \geq 0$ .  $E_{ij}(w)$  represents the total deviation between the sub-industries and the green innovation risk level of manufacturing industry, and can be donated as follows:

$$E_{ij}(w) = \sum_{j=1}^m |v_{ij} w_j - v_{ik} w_j| \quad (12)$$

The green innovation risk identification value of manufacturing industry under the criteria  $j$ , which can be expressed as:

$$E_j(w) = \sum_{i=1}^n E_{ij}(w) = \sum_{i=1}^n \sum_{k=1}^n |v_{ij} - v_{ik}| w_j \quad (13)$$

Under the condition of the maximum total deviation, the objective function about the weighted vector  $w_j$  is constructed as follows:

$$\begin{aligned} \max E(w) &= \sum_{j=1}^m \sum_{i=1}^n \sum_{k=1}^n |v_{ij} - v_{ik}| w_j \\ \text{s.t. } &\sum_{j=1}^m w_j = 1, w_j \geq 0 \end{aligned} \quad (14)$$

Lagrange function is performed for the above optimization model, and its partial derivative is calculated. Hence, weight vector can be obtained:

$$w_j = \frac{\sum_{i=1}^n \sum_{k=1}^n |v_{ij} - v_{ik}|}{\sum_{j=1}^m \sum_{i=1}^n \sum_{k=1}^n |v_{ij} - v_{ik}|} \quad (15)$$

Let  $V_i$  represents the comprehensive score of green innovation risk of manufacturing industry in China under the GVC, and the calculation formula is as follows:

$$V_i = \sum_{j=1}^m w_j v_{ij} \quad (16)$$

### 4. Average method

The average value method is a method that uses the average value to solve problems. For some mathematical problems, if the average value method can be used to solve them skillfully, the result

can be changed from complex to simple [3]. The calculation formula of the average value method is as follows:

$$\overline{X}_t = \sum_{j=1, t=1}^m w_{jt} v_{ijt} / n \quad (17)$$

where  $i = 1, 2, \dots, n$ ,  $j = 1, 2, \dots, m$ , and  $T = 1, 2, \dots, t$ .

## Supplementary Material 2

**Table S3.** Notation definition.

| Nomenclature     |                                                                          |                           |                                                                                |
|------------------|--------------------------------------------------------------------------|---------------------------|--------------------------------------------------------------------------------|
|                  |                                                                          | $\mu_a(x)$                | Triangular fuzzy numbers (TFNs)                                                |
|                  |                                                                          | $D(a)$                    | The fuzzy resolution value of TFN                                              |
| $i$              | Element in row                                                           | $R_{ij}$                  | The assignment matrix of the initial recognition criterion                     |
| $j$              | Element in column                                                        | $\lambda(t)$              | The weight vector of time series                                               |
| $a_{ij}$         | The relative importance of row and column                                | $\varphi$                 | Time degree vector                                                             |
| $M_i$            | Each row element of the comparison judgment matrix                       | $d(\lambda^1, \lambda^2)$ | Euclidean distance between two time weight vector                              |
| $w_i$            | The weight of criterion                                                  | $\theta$                  | Degree of subjective and objective balance                                     |
| $W$              | The relative importance of the next layer to the previous layer          | $\overline{x_j}$          | Group comprehensive identification value                                       |
| $\lambda_{\max}$ | The largest characteristic root of green innovation risk judgment matrix | $S_{c_i}$                 | Comprehensive identification result                                            |
| $CI$             | Consistency criterion                                                    | $E_{ij}(w)$               | Total deviation between the sub-industries and the green innovation risk level |
| $RI$             | Random consistency criterion                                             | $V_i$                     | Comprehensive score of green innovation risk                                   |
| $CR$             | Random consistency ratio                                                 | $\overline{X_t}$          | Average value                                                                  |

### Supplementary Material 3

$$V_{i1}=W_{C_1} \otimes R_{i1}$$

$$= \begin{bmatrix} 0.6125 & 0.5076 & 0.5542 & 0.4734 & 0.4085 & 0.6545 & 0.5068 & 0.4678 & 0.5244 & 0.4817 & 0.5743 & 0.6181 & 0.6933 & 0.5538 & 0.6274 \\ 0.6086 & 0.6631 & 0.6085 & 0.5501 & 0.5326 & 0.3641 & 0.4156 & 0.6118 & 0.3993 & 0.6238 & 0.5700 & 0.5882 & 0.7396 & 0.6649 & 0.5549 \\ 0.4551 & 0.5040 & 0.6616 & 0.6307 & 0.5474 & 0.6825 & 0.4337 & 0.3115 & 0.5768 & 0.6631 & 0.4666 & 0.8380 & 0.6587 & 0.6010 & 0.6486 \end{bmatrix}$$

$$V_{i2}=W_{C_2} \otimes R_{i2}$$

$$= \begin{bmatrix} 0.5497 & 0.5387 & 0.4818 & 0.4525 & 0.4013 & 0.4684 & 0.5402 & 0.5385 & 0.5872 & 0.3993 & 0.6215 & 0.5858 & 0.5407 & 0.7986 & 0.7744 \\ 0.6513 & 0.7190 & 0.6412 & 0.7242 & 0.5737 & 0.4103 & 0.3502 & 0.6457 & 0.3842 & 0.6286 & 0.5831 & 0.5471 & 0.7263 & 0.5952 & 0.6219 \\ 0.4320 & 0.5279 & 0.8065 & 0.5939 & 0.3789 & 0.7389 & 0.4672 & 0.5398 & 0.4744 & 0.6210 & 0.6081 & 0.7713 & 0.6458 & 0.3535 & 0.6850 \end{bmatrix}$$

$$V_{i3}=W_{C_3} \otimes R_{i3}$$

$$= \begin{bmatrix} 0.7004 & 0.7388 & 0.4165 & 0.5806 & 0.4570 & 0.7045 & 0.6118 & 0.6099 & 0.6352 & 0.4707 & 0.6747 & 0.6370 & 0.6270 & 0.8041 & 0.7685 \\ 0.6812 & 0.6919 & 0.7023 & 0.7466 & 0.6025 & 0.6381 & 0.4562 & 0.6832 & 0.5926 & 0.6195 & 0.6471 & 0.5694 & 0.7236 & 0.6817 & 0.6848 \\ 0.7317 & 0.6418 & 0.8075 & 0.7271 & 0.6373 & 0.8024 & 0.5130 & 0.5198 & 0.5205 & 0.6531 & 0.5865 & 0.7105 & 0.6426 & 0.4372 & 0.7408 \end{bmatrix}$$

$$V_{i4}=W_{C_4} \otimes R_{i4}$$

$$= \begin{bmatrix} 0.7389 & 0.7017 & 0.4186 & 0.7649 & 0.5657 & 0.7383 & 0.5959 & 0.4199 & 0.5908 & 0.5917 & 0.6501 & 0.7039 & 0.6358 & 0.8411 & 0.5761 \\ 0.8603 & 0.7842 & 0.6232 & 0.5652 & 0.6219 & 0.5319 & 0.4672 & 0.5506 & 0.6479 & 0.6448 & 0.7310 & 0.5742 & 0.6250 & 0.6411 & 0.5143 \\ 0.7150 & 0.4897 & 0.5919 & 0.8265 & 0.7449 & 0.6751 & 0.3831 & 0.6613 & 0.4511 & 0.8416 & 0.7095 & 0.6819 & 0.5461 & 0.5193 & 0.7581 \end{bmatrix}$$

## References

1. Yin, S.; Li, B Z. Academic research institutes-construction enterprises linkages for the development of urban green building: Selecting management of green building technologies innovation partner. *Sustain. Cities Soc.* **2019**, *48*, 101555.
2. Ma, T.; Xiao, F. An improved method to transform triangular fuzzy number into basic belief assignment in evidence theory. *IEEE Access* **2019**, *7*, 25308–25322.
3. Song, M.; Fisher, R.; Kwok, Y. Technological challenges of green innovation and sustainable resource management with large scale data. *Technol. Forecast. Soc. Chang.* **2019**, *144*, 361–368.
